# Supplementary material
Source: Springer Nature journal article supplement (https://www.springermedizin.de/resource/supplementary/12937_2013_706_MOESM1_ESM.pdf/25653664)

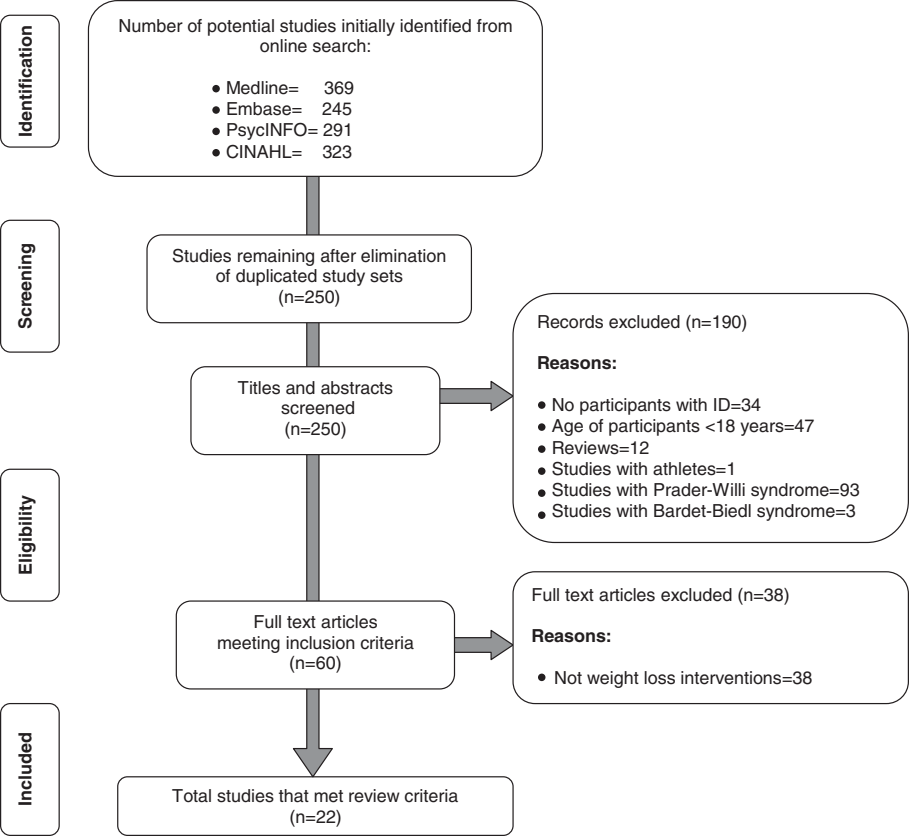

Supplement: MOESM1 [file 25653664]
